# Supplementary material for: Low protection from breakthrough SARS-CoV-2 infection and mild disease course in ocrelizumab-treated patients with multiple sclerosis after three mRNA vaccine doses
Source: PubMed Central journal article supplement — J Neurol Neurosurg Psychiatry. 2023 Apr 25;94(11):934–7. doi: 10.1136/jnnp-2022-330757 (PMC10579504; doi:10.1136/jnnp-2022-330757), 2023-04-25
Supplement: jnnp-2022-330757supp001.pdf [file jnnp-2022-330757supp001.pdf]

**Supplementary Table 1: Test for normal distribution with D'Agostino & Pearson test**

|                       | <b>Abs infected</b> | <b>Abs uninfected</b> | <b>CD4<sup>+</sup> infected</b> | <b>CD4<sup>+</sup> uninfected</b> | <b>CD8<sup>+</sup> infected</b> | <b>CD8<sup>+</sup> uninfected</b> |
|-----------------------|---------------------|-----------------------|---------------------------------|-----------------------------------|---------------------------------|-----------------------------------|
| K2                    | 69.24               | 40.88                 | 3.269                           | 18.15                             | 3.377                           | 7.143                             |
| P value               | <0.0001             | <0.0001               | 0.195                           | 0.0001                            | 0.1848                          | 0.0281                            |
| Passed normality test | No                  | No                    | Yes                             | No                                | Yes                             | No                                |
| P value summary       | ****                | ****                  | ns                              | ***                               | ns                              | *                                 |
